# Supplementary material
Source: publisher figshare collection journal article supplement (https://springernature.figshare.com/ndownloader/files/15648224)
Supplement: Supplementary file [file 15648224]

## Additional file 4: Rankings of major and minor research misbehaviors

### Additional file 4.1. Ranking according to frequency

| Rank | Research Misbehavior                                                      | Frequency<br>(mean) | Lower<br>95% CI | Upper<br>95% CI |
|------|---------------------------------------------------------------------------|---------------------|-----------------|-----------------|
| 1    | Selectively cite to enhance your own findings or convictions (R)          | 3.53                | 3.26            | 3.80            |
| 2    | Insufficiently supervise or mentor junior coworkers (C)                   | 3.46                | 3.18            | 3.74            |
| 3    | Not publish a valid 'negative' study (R)                                  | 3.39                | 3.09            | 3.70            |
| 4    | Demand or accept an authorship for which one does not qualify (C)         | 3.35                | 3.02            | 3.69            |
| 5    | Selectively cite to please editors, reviewers or colleagues (C)           | 3.29                | 2.95            | 3.63            |
| 6    | Selectively cite or cite your own work to improve citation metrics (R)    | 3.27                | 2.99            | 3.55            |
| 7    | Insufficiently report study flaws and limitations (R)                     | 3.23                | 2.95            | 3.52            |
| 8    | Add an author who doesn't qualify for authorship (C)                      | 3.20                | 2.90            | 3.50            |
| 9    | Spread study results over more papers than needed (R)                     | 3.16                | 2.89            | 3.44            |
| 10   | Keep inadequate notes of the research process (D)                         | 3.16                | 2.80            | 3.51            |
| 11   | Turn a blind eye to putative breaches of research integrity by others ..  | 3.13                | 2.81            | 3.43            |
| 12   | Use published ideas or phrases of others without referencing (R)          | 3.11                | 2.82            | 3.41            |
| 13   | Inadequately handle or store data or (bio)materials (D)                   | 3.11                | 2.71            | 3.50            |
| 14   | Not ask permission by contributors for the wording of the acknowledgem..  | 3.07                | 2.74            | 3.41            |
| 15   | Re-use parts of your own publications without referencing (R)             | 3.04                | 2.72            | 3.36            |
| 16   | Not report clearly relevant details of study methods (R)                  | 3.02                | 2.70            | 3.35            |
| 17   | Make no clear distinction between personal views and professional comm..  | 3.00                | 2.67            | 3.33            |
| 17   | Perform data-analyses not stated in the study protocol without disclos..  | 3.00                | 2.64            | 3.36            |
| 19   | Ignore basic principles of quality assurance (D)                          | 2.98                | 2.69            | 3.27            |
| 20   | Let your convictions influence the conclusions substantially (R)          | 2.94                | 2.63            | 3.25            |
| 21   | Use unpublished ideas or phrases of others without their permission (C)   | 2.92                | 2.63            | 3.21            |
| 22   | Not report all study protocol-stipulated results (R)                      | 2.91                | 2.61            | 3.22            |
| 23   | Report an unexpected finding as having been hypothesized from the star..  | 2.88                | 2.43            | 3.33            |
| 24   | Be grossly unfair to your collaborators (C)                               | 2.86                | 2.55            | 3.17            |
| 25   | Propose study questions which are clearly irrelevant (S)                  | 2.83                | 2.44            | 3.23            |
| 26   | Not acknowledge contributors who do not qualify for authorship (C)        | 2.83                | 2.54            | 3.12            |
| 27   | Report on data-driven hypotheses without disclosure (R)                   | 2.83                | 2.50            | 3.15            |
| 28   | Handle existing conflicts of interest inadequately (C)                    | 2.81                | 2.53            | 3.09            |
| 29   | Re-use of previously published data without disclosure (R)                | 2.78                | 2.46            | 3.09            |
| 30   | Collect more data after noticing that the results are almost statistic..  | 2.77                | 2.45            | 3.08            |
| 31   | Take no full responsibility for the integrity of the research project ..  | 2.76                | 2.46            | 3.07            |
| 32   | Unfairly review papers, grant applications or colleagues applying for ..  | 2.76                | 2.42            | 3.09            |
| 33   | Deliberately communicate findings inaccurately in the media or during ..  | 2.75                | 2.41            | 3.08            |
| 34   | Refuse sharing data with bona fide colleagues (C)                         | 2.74                | 2.43            | 3.06            |
| 35   | Not report replication problems (R)                                       | 2.74                | 2.44            | 3.05            |
| 36   | Duplicate publication without disclosure (R)                              | 2.74                | 2.47            | 3.01            |
| 37   | Write no or a clearly inadequate research protocol (S)                    | 2.73                | 2.39            | 3.07            |
| 38   | Failure to disclose a relevant financial or intellectual conflict of i..  | 2.71                | 2.41            | 3.02            |
| 39   | Importantly change the research design during the study without disclo..  | 2.70                | 2.43            | 2.98            |
| 40   | Omit a contributor who deserves authorship (C)                            | 2.68                | 2.39            | 2.97            |
| 41   | Give insufficient attention to the equipment, skills or expertise whic..  | 2.55                | 2.19            | 2.91            |
| 42   | Conceal results that contradict your earlier findings or convictions (R)  | 2.54                | 2.28            | 2.81            |
| 43   | Choose a clearly inadequate research design or using evidently unsuita..  | 2.52                | 2.24            | 2.80            |
| 44   | Submit or resubmit a paper or grant application without consent from a..  | 2.52                | 2.29            | 2.75            |
| 45   | Delete data before performing data analysis without disclosure (R)        | 2.48                | 2.15            | 2.80            |
| 46   | Stop data collection earlier than planned because the results are alre..  | 2.39                | 2.13            | 2.65            |
| 47   | Communicate results to the general public before a peer reviewed publi..  | 2.35                | 2.04            | 2.67            |
| 48   | Not adhere to pertinent laws and regulations (D)                          | 2.35                | 2.03            | 2.67            |
| 49   | Report an incorrect downwardly rounded p-value (R)                        | 2.30                | 1.92            | 2.69            |
| 50   | Selectively delete data, modify data or add fabricated data after perf..  | 2.22                | 1.94            | 2.50            |
| 51   | Ignore substantial risks of the expected findings for society or enviro.. | 2.17                | 1.87            | 2.48            |
| 52   | Refuse to respond to an allegation of a breach of research integrity (C)  | 2.13                | 1.84            | 2.43            |
| 53   | Not share reviewers' comments with all co-authors (C)                     | 2.12                | 1.84            | 2.41            |
| 54   | Modify the results or conclusions of a study due to pressure of a spon..  | 2.10                | 1.78            | 2.41            |
| 55   | Present grossly misleading information in a grant application (C)         | 2.07                | 1.86            | 2.29            |
| 56   | Demand, accept or offer substantial gifts for doing a favor (C)           | 2.06                | 1.74            | 2.37            |
| 57   | Failure to disclose a sponsor of the study (R)                            | 2.02                | 1.76            | 2.29            |
| 58   | Ignore substantial safety risks of the study to participants, workers ..  | 1.91                | 1.60            | 2.22            |
| 59   | Fabricate data (D)                                                        | 1.88                | 1.65            | 2.11            |
| 60   | Review your own papers (C)                                                | 1.68                | 1.41            | 1.95            |

## Additional file 4.2. Ranking according to impact on validity

| Rank | Research Misbehavior                                                     | Truth (mean) | Lower 95% CI | Upper 95% CI |
|------|--------------------------------------------------------------------------|--------------|--------------|--------------|
| 1    | Fabricate data (D)                                                       | 4.63         | 4.43         | 4.84         |
| 2    | Selectively delete data, modify data or add fabricated data after perf.. | 4.37         | 4.10         | 4.62         |
| 3    | Modify the results or conclusions of a study due to pressure of a spon.. | 4.36         | 4.13         | 4.59         |
| 4    | Choose a clearly inadequate research design or using evidently unsuita.. | 4.18         | 3.93         | 4.42         |
| 5    | Conceal results that contradict your earlier findings or convictions (R) | 4.04         | 3.78         | 4.31         |
| 6    | Delete data before performing data analysis without disclosure (R)       | 4.02         | 3.71         | 4.34         |
| 7    | Review your own papers (C)                                               | 4.00         | 3.57         | 4.43         |
| 7    | Ignore basic principles of quality assurance (D)                         | 4.00         | 3.79         | 4.21         |
| 9    | Refuse to respond to an allegation of a breach of research integrity (C) | 3.84         | 3.52         | 4.17         |
| 10   | Keep inadequate notes of the research process (D)                        | 3.82         | 3.56         | 4.09         |
| 11   | Turn a blind eye to putative breaches of research integrity by others .. | 3.78         | 3.52         | 4.04         |
| 12   | Insufficiently report study flaws and limitations (R)                    | 3.77         | 3.53         | 4.01         |
| 13   | Let your convictions influence the conclusions substantially (R)         | 3.74         | 3.47         | 4.01         |
| 14   | Not report replication problems (R)                                      | 3.73         | 3.39         | 4.06         |
| 15   | Give insufficient attention to the equipment, skills or expertise whic.. | 3.70         | 3.47         | 3.93         |
| 16   | Write no or a clearly inadequate research protocol (S)                   | 3.66         | 3.33         | 3.99         |
| 17   | Insufficiently supervise or mentor junior coworkers (C)                  | 3.63         | 3.39         | 3.86         |
| 18   | Not report all study protocol-stipulated results (R)                     | 3.61         | 3.30         | 3.92         |
| 18   | Not report clearly relevant details of study methods (R)                 | 3.61         | 3.32         | 3.90         |
| 20   | Unfairly review papers, grant applications or colleagues applying for .. | 3.57         | 3.28         | 3.87         |
| 21   | Handle existing conflicts of interest inadequately (C)                   | 3.55         | 3.26         | 3.83         |
| 22   | Failure to disclose a relevant financial or intellectual conflict of i.. | 3.53         | 3.24         | 3.82         |
| 23   | Not adhere to pertinent laws and regulations (D)                         | 3.51         | 3.17         | 3.86         |
| 24   | Report an incorrect downwardly rounded p-value (R)                       | 3.50         | 3.17         | 3.84         |
| 25   | Deliberately communicate findings inaccurately in the media or during .. | 3.47         | 3.10         | 3.85         |
| 26   | Importantly change the research design during the study without disclo.. | 3.44         | 3.13         | 3.76         |
| 27   | Perform data-analyses not stated in the study protocol without disclos.. | 3.37         | 2.99         | 3.76         |
| 28   | Report on data-driven hypotheses without disclosure (R)                  | 3.34         | 2.95         | 3.74         |
| 29   | Present grossly misleading information in a grant application (C)        | 3.34         | 2.99         | 3.67         |
| 30   | Selectively cite to enhance your own findings or convictions (R)         | 3.30         | 3.02         | 3.57         |
| 31   | Inadequately handle or store data or (bio)materials (D)                  | 3.29         | 2.91         | 3.67         |
| 32   | Not publish a valid 'negative' study (R)                                 | 3.27         | 2.82         | 3.72         |
| 33   | Ignore substantial risks of the expected findings for society or envir.. | 3.25         | 2.76         | 3.74         |
| 34   | Stop data collection earlier than planned because the results are alre.. | 3.16         | 2.79         | 3.53         |
| 35   | Ignore substantial safety risks of the study to participants, workers .. | 3.15         | 2.69         | 3.60         |
| 36   | Make no clear distinction between personal views and professional comm.. | 3.14         | 2.84         | 3.45         |
| 37   | Collect more data after noticing that the results are almost statistic.. | 3.13         | 2.81         | 3.45         |
| 38   | Failure to disclose a sponsor of the study (R)                           | 3.09         | 2.75         | 3.43         |
| 39   | Take no full responsibility for the integrity of the research project .. | 3.00         | 2.68         | 3.32         |
| 40   | Propose study questions which are clearly irrelevant (S)                 | 2.97         | 2.61         | 3.33         |
| 41   | Use unpublished ideas or phrases of others without their permission (C)  | 2.96         | 2.65         | 3.27         |
| 42   | Refuse sharing data with bona fide colleagues (C)                        | 2.96         | 2.62         | 3.29         |
| 43   | Use published ideas or phrases of others without referencing (R)         | 2.94         | 2.63         | 3.26         |
| 44   | Not share reviewers' comments with all co-authors (C)                    | 2.93         | 2.63         | 3.23         |
| 45   | Demand, accept or offer substantial gifts for doing a favor (C)          | 2.92         | 2.54         | 3.29         |
| 46   | Re-use of previously published data without disclosure (R)               | 2.91         | 2.58         | 3.25         |
| 47   | Report an unexpected finding as having been hypothesized from the star.. | 2.83         | 2.40         | 3.25         |
| 48   | Be grossly unfair to your collaborators (C)                              | 2.74         | 2.44         | 3.04         |
| 49   | Duplicate publication without disclosure (R)                             | 2.65         | 2.28         | 3.02         |
| 50   | Selectively cite or cite your own work to improve citation metrics (R)   | 2.63         | 2.39         | 2.88         |
| 51   | Selectively cite to please editors, reviewers or colleagues (C)          | 2.59         | 2.28         | 3.00         |
| 52   | Submit or resubmit a paper or grant application without consent from a.. | 2.47         | 2.14         | 2.80         |
| 53   | Communicate results to the general public before a peer reviewed publi.. | 2.46         | 2.10         | 2.82         |
| 54   | Spread study results over more papers than needed (R)                    | 2.38         | 2.11         | 2.64         |
| 55   | Re-use parts of your own publications without referencing (R)            | 2.37         | 2.10         | 2.64         |
| 56   | Omit a contributor who deserves authorship (C)                           | 2.30         | 2.05         | 2.55         |
| 57   | Demand or accept an authorship for which one does not qualify (C)        | 2.29         | 1.98         | 2.61         |
| 58   | Add an author who doesn't qualify for authorship (C)                     | 2.07         | 1.77         | 2.37         |
| 59   | Not acknowledge contributors who do not qualify for authorship (C)       | 2.00         | 1.68         | 2.32         |
| 60   | Not ask permission by contributors for the wording of the acknowledgem.. | 1.88         | 1.61         | 2.14         |

### Additional file 4.3. Ranking according to impact on trust

| Rank | Research Misbehavior                                                     | Trust<br>(mean) | Lower<br>95% CI | Upper<br>95% CI |
|------|--------------------------------------------------------------------------|-----------------|-----------------|-----------------|
| 1    | Fabricate data (D)                                                       | 4.70            | 4.51            | 4.89            |
| 2    | Selectively delete data, modify data or add fabricated data after perf.. | 4.48            | 4.28            | 4.69            |
| 3    | Modify the results or conclusions of a study due to pressure of a spon.. | 4.40            | 4.15            | 4.66            |
| 4    | Review your own papers (C)                                               | 4.08            | 3.63            | 4.52            |
| 5    | Unfairly review papers, grant applications or colleagues applying for .. | 4.06            | 3.79            | 4.34            |
| 6    | Refuse to respond to an allegation of a breach of research integrity (C) | 4.00            | 3.71            | 4.29            |
| 7    | Delete data before performing data analysis without disclosure (R)       | 3.95            | 3.65            | 4.26            |
| 8    | Ignore basic principles of quality assurance (D)                         | 3.94            | 3.69            | 4.18            |
| 9    | Conceal results that contradict your earlier findings or convictions (R) | 3.94            | 3.67            | 4.20            |
| 10   | Failure to disclose a relevant financial or intellectual conflict of i.. | 3.92            | 3.65            | 4.19            |
| 11   | Ignore substantial risks of the expected findings for society or envir.. | 3.92            | 3.53            | 4.30            |
| 12   | Turn a blind eye to putative breaches of research integrity by others .. | 3.90            | 3.60            | 4.20            |
| 13   | Use unpublished ideas or phrases of others without their permission (C)  | 3.90            | 3.63            | 4.16            |
| 14   | Use published ideas or phrases of others without referencing (R)         | 3.81            | 3.54            | 4.10            |
| 15   | Not adhere to pertinent laws and regulations (D)                         | 3.80            | 3.48            | 4.12            |
| 16   | Demand, accept or offer substantial gifts for doing a favor (C)          | 3.78            | 3.43            | 4.13            |
| 17   | Deliberately communicate findings inaccurately in the media or during .. | 3.75            | 3.42            | 4.08            |
| 18   | Ignore substantial safety risks of the study to participants, workers .. | 3.74            | 3.37            | 4.10            |
| 19   | Present grossly misleading information in a grant application (C)        | 3.70            | 3.38            | 4.01            |
| 20   | Insufficiently report study flaws and limitations (R)                    | 3.68            | 3.41            | 3.95            |
| 21   | Handle existing conflicts of interest inadequately (C)                   | 3.68            | 3.39            | 3.97            |
| 22   | Be grossly unfair to your collaborators (C)                              | 3.63            | 3.33            | 3.92            |
| 23   | Not report replication problems (R)                                      | 3.59            | 3.23            | 3.95            |
| 24   | Report an incorrect downwardly rounded p-value (R)                       | 3.59            | 3.23            | 3.95            |
| 25   | Not report clearly relevant details of study methods (R)                 | 3.59            | 3.32            | 3.85            |
| 26   | Inadequately handle or store data or (bio)materials (D)                  | 3.58            | 3.29            | 3.87            |
| 27   | Not report all study protocol-stipulated results (R)                     | 3.57            | 3.25            | 3.90            |
| 28   | Refuse sharing data with bona fide colleagues (C)                        | 3.55            | 3.23            | 3.87            |
| 29   | Write no or a clearly inadequate research protocol (S)                   | 3.50            | 3.21            | 3.79            |
| 30   | Keep inadequate notes of the research process (D)                        | 3.47            | 3.14            | 3.79            |
| 31   | Let your convictions influence the conclusions substantially (R)         | 3.44            | 3.15            | 3.73            |
| 32   | Give insufficient attention to the equipment, skills or expertise whic.. | 3.44            | 3.14            | 3.73            |
| 33   | Choose a clearly inadequate research design or using evidently unsuita.. | 3.43            | 3.12            | 3.74            |
| 34   | Insufficiently supervise or mentor junior coworkers (C)                  | 3.40            | 3.17            | 3.64            |
| 35   | Importantly change the research design during the study without disclo.. | 3.38            | 3.02            | 3.74            |
| 36   | Not share reviewers' comments with all co-authors (C)                    | 3.34            | 3.02            | 3.67            |
| 37   | Re-use of previously published data without disclosure (R)               | 3.31            | 2.99            | 3.63            |
| 38   | Take no full responsibility for the integrity of the research project .. | 3.30            | 3.01            | 3.60            |
| 39   | Omit a contributor who deserves authorship (C)                           | 3.30            | 2.98            | 3.61            |
| 40   | Failure to disclose a sponsor of the study (R)                           | 3.27            | 2.91            | 3.64            |
| 41   | Report on data-driven hypotheses without disclosure (R)                  | 3.26            | 2.95            | 3.56            |
| 42   | Demand or accept an authorship for which one does not qualify (C)        | 3.20            | 2.92            | 3.47            |
| 42   | Duplicate publication without disclosure (R)                             | 3.20            | 2.88            | 3.51            |
| 44   | Submit or resubmit a paper or grant application without consent from a.. | 3.19            | 2.88            | 3.50            |
| 45   | Not publish a valid 'negative' study (R)                                 | 3.16            | 2.76            | 3.56            |
| 46   | Selectively cite to enhance your own findings or convictions (R)         | 3.15            | 2.86            | 3.44            |
| 47   | Make no clear distinction between personal views and professional comm.. | 3.09            | 2.83            | 3.36            |
| 48   | Perform data-analyses not stated in the study protocol without disclos.. | 3.09            | 2.75            | 3.42            |
| 49   | Add an author who doesn't qualify for authorship (C)                     | 2.98            | 2.67            | 3.30            |
| 50   | Selectively cite or cite your own work to improve citation metrics (R)   | 2.98            | 2.72            | 3.24            |
| 51   | Propose study questions which are clearly irrelevant (S)                 | 2.97            | 2.69            | 3.25            |
| 52   | Report an unexpected finding as having been hypothesized from the star.. | 2.94            | 2.56            | 3.33            |
| 53   | Collect more data after noticing that the results are almost statistic.. | 2.94            | 2.61            | 3.26            |
| 54   | Stop data collection earlier than planned because the results are alre.. | 2.86            | 2.53            | 3.20            |
| 55   | Selectively cite to please editors, reviewers or colleagues (C)          | 2.86            | 2.54            | 3.19            |
| 56   | Re-use parts of your own publications without referencing (R)            | 2.83            | 2.51            | 3.14            |
| 57   | Not acknowledge contributors who do not qualify for authorship (C)       | 2.81            | 2.46            | 3.16            |
| 58   | Communicate results to the general public before a peer reviewed publi.. | 2.76            | 2.35            | 3.16            |
| 59   | Spread study results over more papers than needed (R)                    | 2.63            | 2.35            | 2.90            |
| 60   | Not ask permission by contributors for the wording of the acknowledgem.. | 2.59            | 2.27            | 2.90            |

## Additional file 4.4. Ranking according to preventability

| Rank | Research Misbehavior                                                     | Prevent-ability (mean) | Lower 95% CI | Upper 95% CI |
|------|--------------------------------------------------------------------------|------------------------|--------------|--------------|
| 1    | Ignore substantial safety risks of the study to participants, workers .. | 3.91                   | 3.58         | 4.25         |
| 2    | Review your own papers (C)                                               | 3.88                   | 3.47         | 4.30         |
| 3    | Ignore basic principles of quality assurance (D)                         | 3.83                   | 3.61         | 4.05         |
| 4    | Use published ideas or phrases of others without referencing (R)         | 3.81                   | 3.55         | 4.08         |
| 5    | Inadequately handle or store data or (bio)materials (D)                  | 3.79                   | 3.50         | 4.08         |
| 6    | Duplicate publication without disclosure (R)                             | 3.79                   | 3.53         | 4.04         |
| 7    | Give insufficient attention to the equipment, skills or expertise whic.. | 3.77                   | 3.54         | 4.00         |
| 8    | Insufficiently supervise or mentor junior coworkers (C)                  | 3.75                   | 3.49         | 4.01         |
| 9    | Submit or resubmit a paper or grant application without consent from a.. | 3.73                   | 3.45         | 4.01         |
| 10   | Choose a clearly inadequate research design or using evidently unsuita.. | 3.71                   | 3.43         | 3.99         |
| 11   | Write no or a clearly inadequate research protocol (S)                   | 3.71                   | 3.40         | 4.01         |
| 12   | Keep inadequate notes of the research process (D)                        | 3.70                   | 3.47         | 3.93         |
| 13   | Not report clearly relevant details of study methods (R)                 | 3.67                   | 3.42         | 3.93         |
| 14   | Not share reviewers' comments with all co-authors (C)                    | 3.63                   | 3.37         | 3.90         |
| 15   | Report an incorrect downwardly rounded p-value (R)                       | 3.62                   | 3.27         | 3.98         |
| 16   | Failure to disclose a sponsor of the study (R)                           | 3.61                   | 3.38         | 3.84         |
| 17   | Ignore substantial risks of the expected findings for society or envir.. | 3.57                   | 3.23         | 3.92         |
| 18   | Re-use parts of your own publications without referencing (R)            | 3.55                   | 3.31         | 3.79         |
| 19   | Modify the results or conclusions of a study due to pressure of a spon.. | 3.54                   | 3.25         | 3.83         |
| 20   | Refuse to respond to an allegation of a breach of research integrity (C) | 3.52                   | 3.21         | 3.83         |
| 21   | Not adhere to pertinent laws and regulations (D)                         | 3.49                   | 3.23         | 3.74         |
| 22   | Importantly change the research design during the study without disclo.. | 3.49                   | 3.17         | 3.80         |
| 23   | Handle existing conflicts of interest inadequately (C)                   | 3.45                   | 3.19         | 3.71         |
| 24   | Not report replication problems (R)                                      | 3.41                   | 3.15         | 3.67         |
| 25   | Failure to disclose a relevant financial or intellectual conflict of i.. | 3.41                   | 3.17         | 3.64         |
| 26   | Insufficiently report study flaws and limitations (R)                    | 3.40                   | 3.17         | 3.64         |
| 27   | Not ask permission by contributors for the wording of the acknowledgem.. | 3.39                   | 3.12         | 3.66         |
| 28   | Re-use of previously published data without disclosure (R)               | 3.38                   | 3.13         | 3.62         |
| 29   | Be grossly unfair to your collaborators (C)                              | 3.37                   | 3.14         | 3.61         |
| 30   | Not report all study protocol-stipulated results (R)                     | 3.37                   | 3.09         | 3.64         |
| 31   | Present grossly misleading information in a grant application (C)        | 3.34                   | 3.10         | 3.58         |
| 32   | Fabricate data (D)                                                       | 3.34                   | 3.05         | 3.63         |
| 33   | Omit a contributor who deserves authorship (C)                           | 3.33                   | 3.09         | 3.56         |
| 34   | Delete data before performing data analysis without disclosure (R)       | 3.29                   | 3.03         | 3.56         |
| 35   | Spread study results over more papers than needed (R)                    | 3.29                   | 3.05         | 3.52         |
| 36   | Not acknowledge contributors who do not qualify for authorship (C)       | 3.27                   | 2.93         | 3.61         |
| 37   | Turn a blind eye to putative breaches of research integrity by others .. | 3.26                   | 3.01         | 3.51         |
| 38   | Take no full responsibility for the integrity of the research project .. | 3.24                   | 2.94         | 3.54         |
| 39   | Not publish a valid 'negative' study (R)                                 | 3.24                   | 2.89         | 3.59         |
| 40   | Demand or accept an authorship for which one does not qualify (C)        | 3.24                   | 2.93         | 3.54         |
| 41   | Selectively delete data, modify data or add fabricated data after perf.. | 3.22                   | 2.91         | 3.51         |
| 42   | Add an author who doesn't qualify for authorship (C)                     | 3.21                   | 2.88         | 3.54         |
| 43   | Communicate results to the general public before a peer reviewed publi.. | 3.19                   | 2.87         | 3.51         |
| 44   | Demand, accept or offer substantial gifts for doing a favor (C)          | 3.19                   | 2.89         | 3.49         |
| 45   | Stop data collection earlier than planned because the results are alre.. | 3.17                   | 2.82         | 3.51         |
| 46   | Selectively cite to enhance your own findings or convictions (R)         | 3.17                   | 2.90         | 3.43         |
| 47   | Perform data-analyses not stated in the study protocol without disclos.. | 3.14                   | 2.75         | 3.54         |
| 48   | Use unpublished ideas or phrases of others without their permission (C)  | 3.14                   | 2.82         | 3.46         |
| 49   | Report on data-driven hypotheses without disclosure (R)                  | 3.14                   | 2.85         | 3.43         |
| 50   | Selectively cite or cite your own work to improve citation metrics (R)   | 3.13                   | 2.88         | 3.39         |
| 51   | Deliberately communicate findings inaccurately in the media or during .. | 3.13                   | 2.79         | 3.46         |
| 52   | Selectively cite to please editors, reviewers or colleagues (C)          | 3.11                   | 2.78         | 3.45         |
| 53   | Conceal results that contradict your earlier findings or convictions (R) | 3.11                   | 2.82         | 3.40         |
| 54   | Refuse sharing data with bona fide colleagues (C)                        | 3.07                   | 2.71         | 3.42         |
| 55   | Report an unexpected finding as having been hypothesized from the star.. | 3.06                   | 2.66         | 3.45         |
| 56   | Propose study questions which are clearly irrelevant (S)                 | 3.06                   | 2.69         | 3.42         |
| 57   | Unfairly review papers, grant applications or colleagues applying for .. | 3.02                   | 2.72         | 3.32         |
| 58   | Make no clear distinction between personal views and professional comm.. | 3.00                   | 2.75         | 3.25         |
| 59   | Let your convictions influence the conclusions substantially (R)         | 2.94                   | 2.66         | 3.22         |
| 60   | Collect more data after noticing that the results are almost statistic.. | 2.83                   | 2.52         | 3.14         |

## Additional file 4.5. Ranking according to product of frequency and impact on validity

| Rank | Research Misbehavior                                                      | Product Truth (mean) | Lower 95% CI | Upper 95% CI |
|------|---------------------------------------------------------------------------|----------------------|--------------|--------------|
| 1    | Insufficiently supervise or mentor junior coworkers (C)                   | 12.59                | 11.29        | 13.89        |
| 2    | Insufficiently report study flaws and limitations (R)                     | 12.32                | 10.99        | 13.65        |
| 3    | Keep inadequate notes of the research process (D)                         | 12.18                | 10.57        | 13.78        |
| 4    | Turn a blind eye to putative breaches of research integrity by others ..  | 12.13                | 10.69        | 13.56        |
| 5    | Ignore basic principles of quality assurance (D)                          | 12.04                | 10.72        | 13.36        |
| 6    | Selectively cite to enhance your own findings or convictions (R)          | 11.70                | 10.38        | 13.01        |
| 7    | Not publish a valid 'negative' study (R)                                  | 11.49                | 9.66         | 13.31        |
| 8    | Let your convictions influence the conclusions substantially (R)          | 11.13                | 9.72         | 12.53        |
| 9    | Not report clearly relevant details of study methods (R)                  | 11.09                | 9.62         | 12.55        |
| 10   | Inadequately handle or store data or (bio)materials (D)                   | 10.87                | 9.12         | 12.62        |
| 11   | Perform data-analyses not stated in the study protocol without disclos..  | 10.74                | 9.07         | 12.42        |
| 12   | Not report replication problems (R)                                       | 10.51                | 9.05         | 11.98        |
| 13   | Conceal results that contradict your earlier findings or convictions (R)  | 10.51                | 9.25         | 11.77        |
| 14   | Choose a clearly inadequate research design or using evidently unsuita..  | 10.39                | 9.06         | 11.71        |
| 15   | Handle existing conflicts of interest inadequately (C)                    | 10.36                | 9.08         | 11.64        |
| 16   | Not report all study protocol-stipulated results (R)                      | 10.31                | 8.90         | 11.73        |
| 17   | Write no or a clearly inadequate research protocol (S)                    | 10.27                | 8.74         | 11.80        |
| 18   | Unfairly review papers, grant applications or colleagues applying for ..  | 10.23                | 8.78         | 11.69        |
| 19   | Delete data before performing data analysis without disclosure (R)        | 10.10                | 8.58         | 11.61        |
| 20   | Report on data-driven hypotheses without disclosure (R)                   | 9.97                 | 8.41         | 11.53        |
| 21   | Failure to disclose a relevant financial or intellectual conflict of i..  | 9.94                 | 8.60         | 11.28        |
| 22   | Make no clear distinction between personal views and professional comm..  | 9.81                 | 8.44         | 11.18        |
| 23   | Give insufficient attention to the equipment, skills or expertise whic..  | 9.80                 | 8.35         | 11.25        |
| 24   | Selectively delete data, modify data or add fabricated data after perf..  | 9.68                 | 8.32         | 11.04        |
| 25   | Importantly change the research design during the study without disclo..  | 9.56                 | 8.28         | 10.83        |
| 26   | Use published ideas or phrases of others without referencing (R)          | 9.55                 | 8.23         | 10.87        |
| 27   | Deliberately communicate findings inaccurately in the media or during ..  | 9.45                 | 7.90         | 11.00        |
| 28   | Propose study questions which are clearly irrelevant (S)                  | 9.33                 | 7.78         | 10.89        |
| 29   | Modify the results or conclusions of a study due to pressure of a spon..  | 9.12                 | 7.65         | 10.59        |
| 30   | Collect more data after noticing that the results are almost statistic..  | 8.98                 | 7.66         | 10.29        |
| 31   | Selectively cite to please editors, reviewers or colleagues (C)           | 8.98                 | 7.64         | 10.32        |
| 32   | Selectively cite or cite your own work to improve citation metrics (R)    | 8.92                 | 7.83         | 10.02        |
| 33   | Use unpublished ideas or phrases of others without their permission (C)   | 8.84                 | 7.59         | 10.08        |
| 34   | Fabricate data (D)                                                        | 8.82                 | 7.69         | 9.94         |
| 35   | Take no full responsibility for the integrity of the research project ..  | 8.69                 | 7.41         | 9.97         |
| 36   | Re-use of previously published data without disclosure (R)                | 8.56                 | 7.24         | 9.87         |
| 37   | Not adhere to pertinent laws and regulations (D)                          | 8.53                 | 7.15         | 9.92         |
| 38   | Refuse sharing data with bona fide colleagues (C)                         | 8.45                 | 7.13         | 9.77         |
| 39   | Refuse to respond to an allegation of a breach of research integrity (C)  | 8.40                 | 7.06         | 9.74         |
| 40   | Report an unexpected finding as having been hypothesized from the star..  | 8.35                 | 6.59         | 10.12        |
| 41   | Be grossly unfair to your collaborators (C)                               | 8.30                 | 7.09         | 9.51         |
| 42   | Demand or accept an authorship for which one does not qualify (C)         | 8.27                 | 6.96         | 9.59         |
| 43   | Report an incorrect downwardly rounded p-value (R)                        | 8.06                 | 6.49         | 9.63         |
| 44   | Spread study results over more papers than needed (R)                     | 7.69                 | 6.62         | 8.76         |
| 45   | Stop data collection earlier than planned because the results are alre..  | 7.33                 | 6.12         | 8.54         |
| 46   | Re-use parts of your own publications without referencing (R)             | 7.20                 | 6.10         | 8.30         |
| 47   | Ignore substantial risks of the expected findings for society or enviro.. | 7.11                 | 5.66         | 8.57         |
| 48   | Duplicate publication without disclosure (R)                              | 7.08                 | 5.83         | 8.33         |
| 49   | Present grossly misleading information in a grant application (C)         | 6.88                 | 5.86         | 7.90         |
| 50   | Add an author who doesn't qualify for authorship (C)                      | 6.73                 | 5.59         | 7.86         |
| 51   | Review your own papers (C)                                                | 6.64                 | 5.33         | 7.95         |
| 52   | Omit a contributor who deserves authorship (C)                            | 6.40                 | 5.46         | 7.35         |
| 53   | Submit or resubmit a paper or grant application without consent from a..  | 6.36                 | 5.34         | 7.38         |
| 54   | Ignore substantial safety risks of the study to participants, workers ..  | 6.30                 | 4.99         | 7.61         |
| 55   | Not share reviewers' comments with all co-authors (C)                     | 6.07                 | 5.02         | 7.12         |
| 56   | Failure to disclose a sponsor of the study (R)                            | 5.98                 | 4.92         | 7.04         |
| 57   | Not acknowledge contributors who do not qualify for authorship (C)        | 5.77                 | 4.67         | 6.86         |
| 58   | Not ask permission by contributors for the wording of the acknowledgem..  | 5.71                 | 4.67         | 6.75         |
| 59   | Demand, accept or offer substantial gifts for doing a favor (C)           | 5.61                 | 4.42         | 6.81         |
| 59   | Communicate results to the general public before a peer reviewed publi..  | 5.61                 | 4.46         | 6.76         |

## Additional file 4.6. Ranking according to product of frequency and impact on trust

| Rank | Research Misbehavior                                                      | Product Trust (mean) | Lower 95% CI | Upper 95% CI |
|------|---------------------------------------------------------------------------|----------------------|--------------|--------------|
| 1    | Use published ideas or phrases of others without referencing (R)          | 12.08                | 10.66        | 13.50        |
| 2    | Insufficiently report study flaws and limitations (R)                     | 12.04                | 10.68        | 13.41        |
| 3    | Turn a blind eye to putative breaches of research integrity by others ..  | 11.96                | 10.43        | 13.49        |
| 4    | Insufficiently supervise or mentor junior coworkers (C)                   | 11.81                | 10.55        | 13.07        |
| 5    | Ignore basic principles of quality assurance (D)                          | 11.76                | 10.40        | 13.11        |
| 6    | Unfairly review papers, grant applications or colleagues applying for ..  | 11.71                | 10.15        | 13.27        |
| 7    | Use unpublished ideas or phrases of others without their permission (C)   | 11.41                | 10.04        | 12.78        |
| 8    | Demand or accept an authorship for which one does not qualify (C)         | 11.24                | 9.82         | 12.65        |
| 9    | Inadequately handle or store data or (bio)materials (D)                   | 11.18                | 9.50         | 12.87        |
| 10   | Keep inadequate notes of the research process (D)                         | 10.93                | 9.32         | 12.55        |
| 11   | Not publish a valid 'negative' study (R)                                  | 10.92                | 9.24         | 12.60        |
| 12   | Selectively cite to enhance your own findings or convictions (R)          | 10.75                | 9.42         | 12.09        |
| 13   | Not report clearly relevant details of study methods (R)                  | 10.70                | 9.28         | 12.11        |
| 14   | Failure to disclose a relevant financial or intellectual conflict of i..  | 10.61                | 9.20         | 12.03        |
| 15   | Be grossly unfair to your collaborators (C)                               | 10.59                | 9.18         | 12.00        |
| 16   | Handle existing conflicts of interest inadequately (C)                    | 10.55                | 9.24         | 11.86        |
| 17   | Deliberately communicate findings inaccurately in the media or during ..  | 10.20                | 8.65         | 11.75        |
| 18   | Refuse sharing data with bona fide colleagues (C)                         | 10.17                | 8.74         | 11.60        |
| 19   | Not report all study protocol-stipulated results (R)                      | 10.13                | 8.69         | 11.57        |
| 20   | Let your convictions influence the conclusions substantially (R)          | 10.08                | 8.71         | 11.46        |
| 21   | Selectively cite or cite your own work to improve citation metrics (R)    | 10.08                | 8.88         | 11.27        |
| 22   | Not report replication problems (R)                                       | 10.02                | 8.54         | 11.51        |
| 23   | Conceal results that contradict your earlier findings or convictions (R)  | 9.93                 | 8.70         | 11.17        |
| 24   | Selectively delete data, modify data or add fabricated data after perf..  | 9.86                 | 8.52         | 11.20        |
| 25   | Delete data before performing data analysis without disclosure (R)        | 9.73                 | 8.25         | 11.21        |
| 26   | Selectively cite to please editors, reviewers or colleagues (C)           | 9.61                 | 8.17         | 11.05        |
| 27   | Report on data-driven hypotheses without disclosure (R)                   | 9.49                 | 8.12         | 10.85        |
| 28   | Re-use of previously published data without disclosure (R)                | 9.48                 | 8.11         | 10.85        |
| 29   | Add an author who doesn't qualify for authorship (C)                      | 9.38                 | 8.03         | 10.73        |
| 30   | Write no or a clearly inadequate research protocol (S)                    | 9.38                 | 7.95         | 10.80        |
| 31   | Make no clear distinction between personal views and professional comm..  | 9.35                 | 8.06         | 10.64        |
| 32   | Perform data-analyses not stated in the study protocol without disclos..  | 9.26                 | 7.76         | 10.75        |
| 33   | Modify the results or conclusions of a study due to pressure of a spon..  | 9.12                 | 7.62         | 10.62        |
| 34   | Take no full responsibility for the integrity of the research project ..  | 9.02                 | 7.73         | 10.31        |
| 35   | Importantly change the research design during the study without disclo..  | 9.00                 | 7.66         | 10.34        |
| 36   | Give insufficient attention to the equipment, skills or expertise whic..  | 8.97                 | 7.53         | 10.42        |
| 37   | Omit a contributor who deserves authorship (C)                            | 8.91                 | 7.65         | 10.18        |
| 38   | Propose study questions which are clearly irrelevant (S)                  | 8.86                 | 7.45         | 10.28        |
| 39   | Fabricate data (D)                                                        | 8.76                 | 7.63         | 9.89         |
| 40   | Choose a clearly inadequate research design or using evidently unsuita..  | 8.74                 | 7.50         | 9.98         |
| 41   | Not adhere to pertinent laws and regulations (D)                          | 8.70                 | 7.28         | 10.12        |
| 42   | Duplicate publication without disclosure (R)                              | 8.61                 | 7.39         | 9.83         |
| 43   | Refuse to respond to an allegation of a breach of research integrity (C)  | 8.53                 | 7.19         | 9.87         |
| 44   | Ignore substantial risks of the expected findings for society or enviro.. | 8.51                 | 7.05         | 9.98         |
| 45   | Spread study results over more papers than needed (R)                     | 8.45                 | 7.33         | 9.58         |
| 46   | Re-use parts of your own publications without referencing (R)             | 8.43                 | 7.12         | 9.73         |
| 47   | Report an incorrect downwardly rounded p-value (R)                        | 8.27                 | 6.65         | 9.89         |
| 48   | Submit or resubmit a paper or grant application without consent from a..  | 8.26                 | 7.18         | 9.34         |
| 49   | Collect more data after noticing that the results are almost statistic..  | 8.19                 | 6.90         | 9.48         |
| 50   | Report an unexpected finding as having been hypothesized from the star..  | 8.15                 | 6.41         | 9.88         |
| 51   | Not acknowledge contributors who do not qualify for authorship (C)        | 8.11                 | 6.82         | 9.39         |
| 52   | Not ask permission by contributors for the wording of the acknowledgem..  | 7.93                 | 6.62         | 9.23         |
| 53   | Present grossly misleading information in a grant application (C)         | 7.37                 | 6.33         | 8.40         |
| 54   | Demand, accept or offer substantial gifts for doing a favor (C)           | 7.17                 | 5.79         | 8.55         |
| 55   | Ignore substantial safety risks of the study to participants, workers ..  | 7.12                 | 5.76         | 8.48         |
| 56   | Not share reviewers' comments with all co-authors (C)                     | 6.88                 | 5.70         | 8.05         |
| 57   | Review your own papers (C)                                                | 6.76                 | 5.42         | 8.10         |
| 58   | Stop data collection earlier than planned because the results are alre..  | 6.56                 | 5.46         | 7.65         |
| 59   | Failure to disclose a sponsor of the study (R)                            | 6.43                 | 5.30         | 7.56         |
| 60   | Communicate results to the general public before a peer reviewed publi..  | 6.17                 | 4.88         | 7.46         |

## Additional file 4.7. Ranking according to product of frequency and preventability

| Rank | Research Misbehavior                                                      | Product Prevent-ability (mean) | Lower 95% CI | Upper 95% CI |
|------|---------------------------------------------------------------------------|--------------------------------|--------------|--------------|
| 1    | Insufficiently supervise or mentor junior coworkers (C)                   | 12.96                          | 11.57        | 14.36        |
| 2    | Inadequately handle or store data or (bio)materials (D)                   | 11.97                          | 10.22        | 13.72        |
| 3    | Use published ideas or phrases of others without referencing (R)          | 11.91                          | 10.49        | 13.32        |
| 4    | Keep inadequate notes of the research process (D)                         | 11.89                          | 10.37        | 13.40        |
| 5    | Ignore basic principles of quality assurance (D)                          | 11.40                          | 10.11        | 12.68        |
| 6    | Not report clearly relevant details of study methods (R)                  | 11.24                          | 9.81         | 12.67        |
| 7    | Insufficiently report study flaws and limitations (R)                     | 11.15                          | 9.91         | 12.39        |
| 8    | Not publish a valid 'negative' study (R)                                  | 11.08                          | 9.52         | 12.63        |
| 9    | Selectively cite to enhance your own findings or convictions (R)          | 10.96                          | 9.68         | 12.24        |
| 10   | Re-use parts of your own publications without referencing (R)             | 10.90                          | 9.56         | 12.24        |
| 11   | Demand or accept an authorship for which one does not qualify (C)         | 10.84                          | 9.34         | 12.35        |
| 12   | Selectively cite to please editors, reviewers or colleagues (C)           | 10.66                          | 9.14         | 12.18        |
| 13   | Not ask permission by contributors for the wording of the acknowledgem..  | 10.49                          | 9.07         | 11.91        |
| 14   | Selectively cite or cite your own work to improve citation metrics (R)    | 10.47                          | 9.26         | 11.68        |
| 15   | Spread study results over more papers than needed (R)                     | 10.45                          | 9.27         | 11.64        |
| 16   | Write no or a clearly inadequate research protocol (S)                    | 10.43                          | 8.93         | 11.93        |
| 17   | Add an author who doesn't qualify for authorship (C)                      | 10.37                          | 8.94         | 11.80        |
| 18   | Duplicate publication without disclosure (R)                              | 10.30                          | 9.05         | 11.55        |
| 19   | Turn a blind eye to putative breaches of research integrity by others ..  | 10.23                          | 8.95         | 11.51        |
| 20   | Give insufficient attention to the equipment, skills or expertise whic..  | 9.92                           | 8.45         | 11.40        |
| 21   | Handle existing conflicts of interest inadequately (C)                    | 9.85                           | 8.63         | 11.06        |
| 22   | Not report all study protocol-stipulated results (R)                      | 9.84                           | 8.54         | 11.14        |
| 23   | Be grossly unfair to your collaborators (C)                               | 9.80                           | 8.56         | 11.05        |
| 24   | Perform data-analyses not stated in the study protocol without disclos..  | 9.60                           | 7.96         | 11.24        |
| 25   | Submit or resubmit a paper or grant application without consent from a..  | 9.56                           | 8.44         | 10.68        |
| 26   | Use unpublished ideas or phrases of others without their permission (C)   | 9.51                           | 8.21         | 10.81        |
| 27   | Not acknowledge contributors who do not qualify for authorship (C)        | 9.43                           | 8.06         | 10.79        |
| 28   | Importantly change the research design during the study without disclo..  | 9.38                           | 8.10         | 10.66        |
| 29   | Not report replication problems (R)                                       | 9.35                           | 8.09         | 10.61        |
| 30   | Choose a clearly inadequate research design or using evidently unsuita..  | 9.27                           | 8.01         | 10.54        |
| 31   | Re-use of previously published data without disclosure (R)                | 9.25                           | 7.98         | 10.52        |
| 32   | Report on data-driven hypotheses without disclosure (R)                   | 9.23                           | 7.91         | 10.54        |
| 33   | Omit a contributor who deserves authorship (C)                            | 9.15                           | 8.01         | 10.30        |
| 34   | Failure to disclose a relevant financial or intellectual conflict of i..  | 9.10                           | 7.87         | 10.33        |
| 35   | Propose study questions which are clearly irrelevant (S)                  | 9.06                           | 7.46         | 10.65        |
| 36   | Make no clear distinction between personal views and professional comm..  | 8.95                           | 7.72         | 10.19        |
| 37   | Take no full responsibility for the integrity of the research project ..  | 8.80                           | 7.51         | 10.09        |
| 38   | Report an unexpected finding as having been hypothesized from the star..  | 8.74                           | 6.95         | 10.52        |
| 39   | Unfairly review papers, grant applications or colleagues applying for ..  | 8.73                           | 7.42         | 10.04        |
| 40   | Let your convictions influence the conclusions substantially (R)          | 8.65                           | 7.42         | 9.87         |
| 41   | Refuse sharing data with bona fide colleagues (C)                         | 8.57                           | 7.18         | 9.95         |
| 42   | Deliberately communicate findings inaccurately in the media or during ..  | 8.50                           | 7.11         | 9.89         |
| 43   | Delete data before performing data analysis without disclosure (R)        | 8.45                           | 7.20         | 9.70         |
| 44   | Report an incorrect downwardly rounded p-value (R)                        | 8.42                           | 6.80         | 10.05        |
| 45   | Not adhere to pertinent laws and regulations (D)                          | 8.42                           | 7.16         | 9.68         |
| 46   | Collect more data after noticing that the results are almost statistic..  | 7.96                           | 6.74         | 9.18         |
| 47   | Ignore substantial risks of the expected findings for society or envirc.. | 7.94                           | 6.61         | 9.28         |
| 48   | Conceal results that contradict your earlier findings or convictions (R)  | 7.82                           | 6.72         | 8.92         |
| 49   | Not share reviewers' comments with all co-authors (C)                     | 7.71                           | 6.53         | 8.88         |
| 50   | Ignore substantial safety risks of the study to participants, workers ..  | 7.48                           | 6.11         | 8.86         |
| 51   | Refuse to respond to an allegation of a breach of research integrity (C)  | 7.42                           | 6.19         | 8.66         |
| 52   | Stop data collection earlier than planned because the results are alre..  | 7.40                           | 6.23         | 8.57         |
| 53   | Modify the results or conclusions of a study due to pressure of a spon..  | 7.22                           | 5.94         | 8.50         |
| 54   | Failure to disclose a sponsor of the study (R)                            | 7.12                           | 6.06         | 8.18         |
| 55   | Communicate results to the general public before a peer reviewed publi..  | 7.06                           | 5.80         | 8.32         |
| 56   | Selectively delete data, modify data or add fabricated data after perf..  | 7.02                           | 5.90         | 8.14         |
| 57   | Present grossly misleading information in a grant application (C)         | 6.81                           | 5.94         | 7.68         |
| 58   | Demand, accept or offer substantial gifts for doing a favor (C)           | 6.42                           | 5.24         | 7.59         |
| 59   | Fabricate data (D)                                                        | 6.40                           | 5.46         | 7.34         |
| 60   | Review your own papers (C)                                                | 6.32                           | 5.06         | 7.58         |

## Additional file 4.8. Ranking according to priority for RCR

| Rank | Research Misbehavior                                                        | priority<br>for RCR<br>(mean) | Lower<br>95% CI | Upper<br>95% CI |
|------|-----------------------------------------------------------------------------|-------------------------------|-----------------|-----------------|
| 1    | Fabricate data (D)                                                          | 4.53                          | 4.32            | 4.74            |
| 2    | Selectively delete data, modify data or add fabricated data after perf..    | 4.41                          | 4.23            | 4.60            |
| 3    | Turn a blind eye to putative breaches of research integrity by others ..    | 4.12                          | 3.91            | 4.33            |
| 4    | Ignore substantial safety risks of the study to participants, workers ..    | 4.03                          | 3.67            | 4.39            |
| 5    | Modify the results or conclusions of a study due to pressure of a spon..    | 4.02                          | 3.73            | 4.32            |
| 6    | Ignore basic principles of quality assurance (D)                            | 4.02                          | 3.81            | 4.24            |
| 7    | Insufficiently supervise or mentor junior coworkers (C)                     | 3.96                          | 3.76            | 4.16            |
| 8    | Ignore substantial risks of the expected findings for society or envir..    | 3.92                          | 3.56            | 4.28            |
| 9    | Not report all study protocol-stipulated results (R)                        | 3.91                          | 3.64            | 4.19            |
| 10   | Conceal results that contradict your earlier findings or convictions (R)    | 3.89                          | 3.63            | 4.16            |
| 11   | Refuse to respond to an allegation of a breach of research integrity (C)    | 3.89                          | 3.64            | 4.14            |
| 12   | Delete data before performing data analysis without disclosure (R)          | 3.88                          | 3.57            | 4.19            |
| 13   | Failure to disclose a relevant financial or intellectual conflict of i..    | 3.81                          | 3.55            | 4.07            |
| 14   | Present grossly misleading information in a grant application (C)           | 3.80                          | 3.50            | 4.09            |
| 15   | Not adhere to pertinent laws and regulations (D)                            | 3.78                          | 3.48            | 4.08            |
| 16   | Keep inadequate notes of the research process (D)                           | 3.75                          | 3.46            | 4.04            |
| 17   | Handle existing conflicts of interest inadequately (C)                      | 3.74                          | 3.49            | 3.99            |
| 18   | Choose a clearly inadequate research design or using evidently unsuita..    | 3.74                          | 3.44            | 4.04            |
| 19   | Take no full responsibility for the integrity of the research project ..    | 3.73                          | 3.47            | 3.99            |
| 20   | Use published ideas or phrases of others without referencing (R)            | 3.72                          | 3.47            | 3.97            |
| 21   | Inadequately handle or store data or (bio)materials (D)                     | 3.71                          | 3.43            | 4.01            |
| 22   | Write no or a clearly inadequate research protocol (S)                      | 3.69                          | 3.42            | 3.96            |
| 23   | Not report replication problems (R)                                         | 3.68                          | 3.38            | 3.98            |
| 24   | Not publish a valid 'negative' study (R)                                    | 3.66                          | 3.33            | 4.00            |
| 25   | Unfairly review papers, grant applications or colleagues applying for ..    | 3.64                          | 3.33            | 3.94            |
| 25   | Insufficiently report study flaws and limitations (R)                       | 3.64                          | 3.38            | 3.90            |
| 27   | Not report clearly relevant details of study methods (R)                    | 3.61                          | 3.33            | 3.88            |
| 28   | Let your convictions influence the conclusions substantially (R)            | 3.59                          | 3.31            | 3.86            |
| 29   | Report an incorrect downwardly rounded p-value (R)                          | 3.53                          | 3.25            | 3.81            |
| 30   | Demand or accept an authorship for which one does not qualify (C)           | 3.53                          | 3.25            | 3.81            |
| 31   | Use unpublished ideas or phrases of others without their permission (C)     | 3.50                          | 3.22            | 3.78            |
| 32   | Be grossly unfair to your collaborators (C)                                 | 3.49                          | 3.25            | 3.73            |
| 33   | Give insufficient attention to the equipment, skills or expertise whic..    | 3.47                          | 3.22            | 3.73            |
| 34   | Deliberately communicate findings inaccurately in the media or during ..    | 3.46                          | 3.18            | 3.75            |
| 35   | Report on data-driven hypotheses without disclosure (R)                     | 3.34                          | 3.03            | 3.65            |
| 36   | Importantly change the research design during the study without disclo..    | 3.34                          | 3.07            | 3.61            |
| 37   | Demand, accept or offer substantial gifts for doing a favor (C)             | 3.33                          | 3.00            | 3.66            |
| 37   | Re-use of previously published data without disclosure (R)                  | 3.33                          | 3.00            | 3.66            |
| 39   | Failure to disclose a sponsor of the study (R)                              | 3.30                          | 3.01            | 3.59            |
| 40   | Perform data-analyses not stated in the study protocol without disclos..    | 3.28                          | 2.97            | 3.59            |
| 41   | Review your own papers (C)                                                  | 3.26                          | 2.80            | 3.72            |
| 42   | Selectively cite to enhance your own findings or convictions (R)            | 3.25                          | 2.98            | 3.53            |
| 43   | Duplicate publication without disclosure (R)                                | 3.22                          | 2.91            | 3.53            |
| 44   | Refuse sharing data with bona fide colleagues (C)                           | 3.19                          | 2.87            | 3.51            |
| 45   | Omit a contributor who deserves authorship (C)                              | 3.15                          | 2.89            | 3.41            |
| 46   | Add an author who doesn't qualify for authorship (C)                        | 3.15                          | 2.85            | 3.44            |
| 47   | Submit or resubmit a paper or grant application without consent from a..    | 3.13                          | 2.87            | 3.40            |
| 48   | Not share reviewers' comments with all co-authors (C)                       | 3.13                          | 2.86            | 3.39            |
| 49   | Make no clear distinction between personal views and professional comm..    | 3.12                          | 2.90            | 3.33            |
| 50   | Selectively cite to please editors, reviewers or colleagues (C)             | 3.07                          | 2.73            | 3.41            |
| 51   | Selectively cite or cite your own work to improve citation metrics (R)      | 3.06                          | 2.83            | 3.28            |
| 52   | Report an unexpected finding as having been hypothesized from the star..    | 3.06                          | 2.66            | 3.46            |
| 53   | Stop data collection earlier than planned because the results are alre..    | 3.03                          | 2.68            | 3.37            |
| 54   | Collect more data after noticing that the results are almost statistic..    | 3.00                          | 2.68            | 3.32            |
| 54   | Spread study results over more papers than needed (R)                       | 3.00                          | 2.75            | 3.25            |
| 56   | Propose study questions which are clearly irrelevant (S)                    | 2.95                          | 2.60            | 3.29            |
| 57   | Re-use parts of your own publications without referencing (R)               | 2.94                          | 2.63            | 3.25            |
| 58   | Not acknowledge contributors who do not qualify for authorship (C)          | 2.87                          | 2.55            | 3.19            |
| 59   | Communicate results to the general public before a peer reviewed publi..    | 2.67                          | 2.28            | 3.06            |
| 60   | Not ask permission by contributors for the wording of the acknowledgement.. | 2.47                          | 2.19            | 2.76            |
